# Supplementary material for: Eight Zn(ii) coordination networks based on flexible 1,4-di(1H-imidazol-1-yl)butane and different dicarboxylates: crystal structures, water clusters, and topologies
Source: Royal Society of Chemistry journal article supplement (doi:10.1039/c3dt51114f), 2013-01-01
Supplement: c3dt51114f.pdf [file c3dt51114f.pdf]

*Electronic Supplementary Information (ESI) for Dalton  
Transactions*

**Eight Zn(II) coordination networks based on flexible  
1,4-di(1H-imidazol-1-yl)butane and different dicarboxylates:  
Crystal structures, water clusters, and topologies**

**Di Sun,\* Meng-Zhen Xu, Shan-Shan Liu, Shuai Yuan, Hai-Feng Lu, Sheng-Yu Feng,  
Dao-Feng Sun**

*Key Lab of Colloid and Interface Chemistry, Ministry of Education, School of Chemistry and Chemical  
Engineering, Shandong University, Jinan, 250100, P. R. China. E-mail: dsun@sdu.edu.cn.*

*Content*

|                                                                                                                                |   |
|--------------------------------------------------------------------------------------------------------------------------------|---|
| (1) Figure S1: The T4(2)6(2) water tape penetrates the windows of the 2D network of 2. ....                                    | 2 |
| (2) Figure S2: The structural graphics for structure of 2. ....                                                                | 2 |
| (3) Figure S3: The structural graphics for structure of 4. ....                                                                | 3 |
| (4) Figure S4: The structural graphics for structure of 7. ....                                                                | 3 |
| (5) Figure S5: The structural graphics for structure of 8. ....                                                                | 4 |
| (6) Figure S6: PXRD patterns of 1-8. ....                                                                                      | 5 |
| (7) Figure S7: Solid-State Photoluminescences of CPs 1-8 at 77 K (black line) and 298 K (red<br>line).....                     | 6 |
| (8) Table S1: Selected bond lengths (Å) and angle (°) for 1-8. ....                                                            | 7 |
| (9) Table S2: The Dimensions of the Windows and the Thickness of the 4 <sup>4</sup> -sql Networks of 1,<br>2, 4, 7 and 8. .... | 8 |

(1) **Figure S1:** The T4(2)6(2) water tape penetrates the windows of the 2D network of **2**.

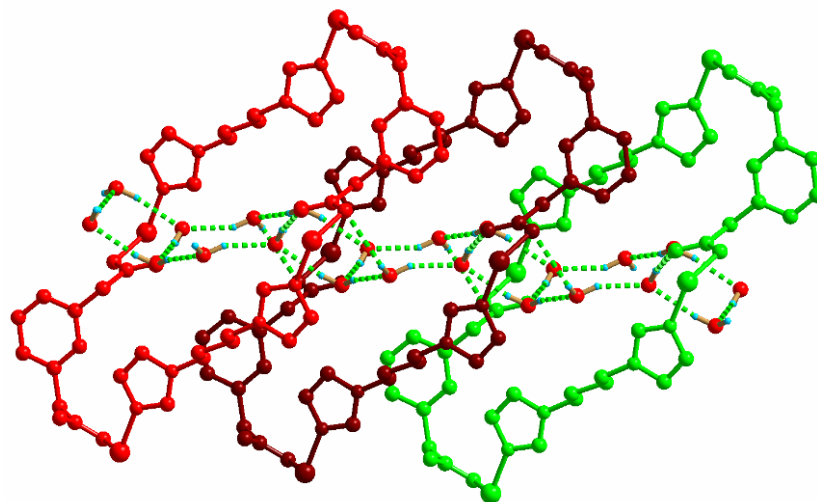

(2) **Figure S2:** The structural graphics for structure of **2**.

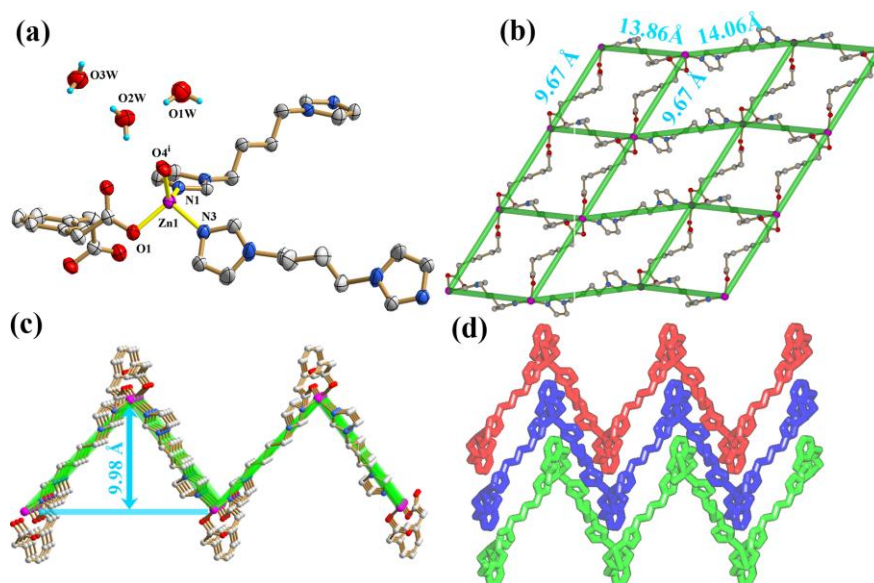

**Figure S2** (a) The coordination environment of Zn(II) ion in **2** with the thermal ellipsoids at 50% probability level. (b) Ball-and-stick view of the 2D 4<sup>4</sup>-sql net (Purple ball: Zn; Blue ball: N; Red ball: O; Gray: C). (c) Side view of the undulated 4<sup>4</sup>-sql net in the structure of **2**. (d) The packing of 2D nets in the crystal. (networks individually colored)

**(3) Figure S3: The structural graphics for structure of 4.**

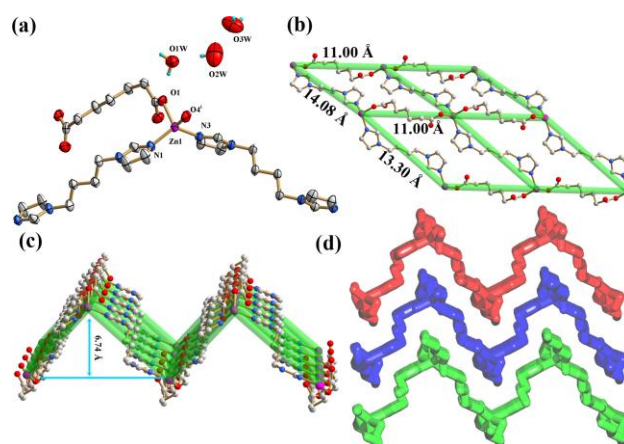

**Figure S3** (a) The coordination environment of Zn(II) ion in **4** (Symmetry code: (iii)  $-x+1, -y+1, -z+1$ ). (b) Ball-and-Stick view of the 2D  $4^4$ -sq1 net. (c) Side view of the undulated  $4^4$ -sq1 net in the structure of **4** (Purple ball: Zn; Blue ball: N; Red ball: O; Gray: C). (d) The packing of 2D nets in the crystal. (networks individually colored)

**(4) Figure S4: The structural graphics for structure of 7.**

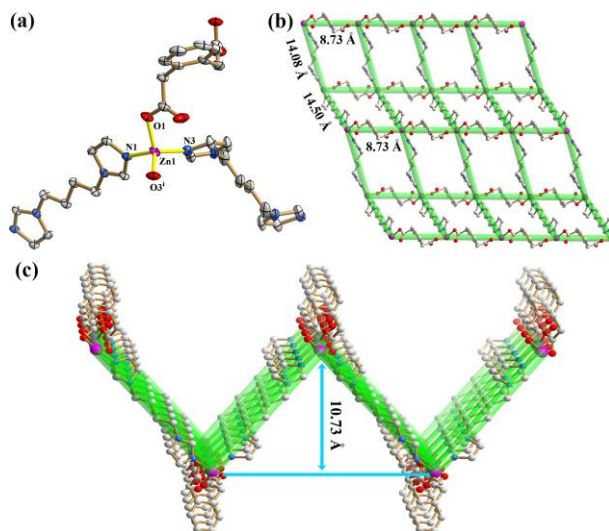

**Figure S4** (a) The coordination environment of Zn(II) ion in **7** (Symmetry code: (i)  $x, y-1, z$ ). (b) Ball-and-Stick view of the 2D  $4^4$ -sq1 net. (c) Side view of the undulated  $4^4$ -sq1 net in the structure of **7** (Purple ball: Zn; Blue ball: N; Red ball: O; Gray: C).

(5) **Figure S5: The structural graphics for structure of 8.**

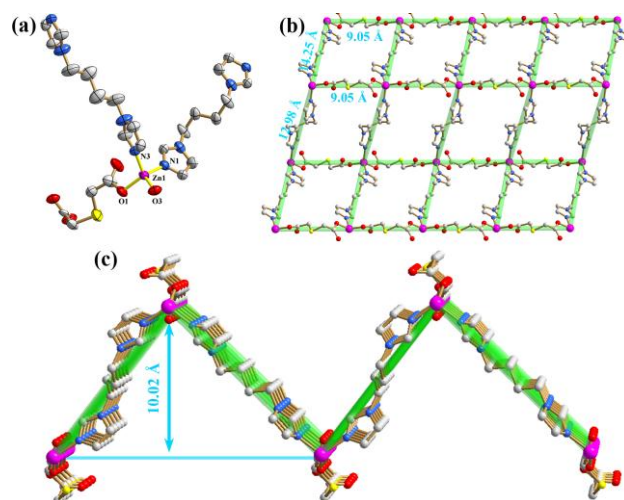

**Figure S5** (a) The coordination environment of Zn(II) ion in **8** Symmetry code: (i)  $x, y-1, z$ . (b) Ball-and-Stick view of the 2D  $4^4$ -**sql** net. (c) Side view of the undulated  $4^4$ -**sql** net in the structure of **7** (Purple ball: Zn; Blue ball: N; Red ball: O; Gray: C).

**(6) Figure S6: PXRD patterns of 1-8**

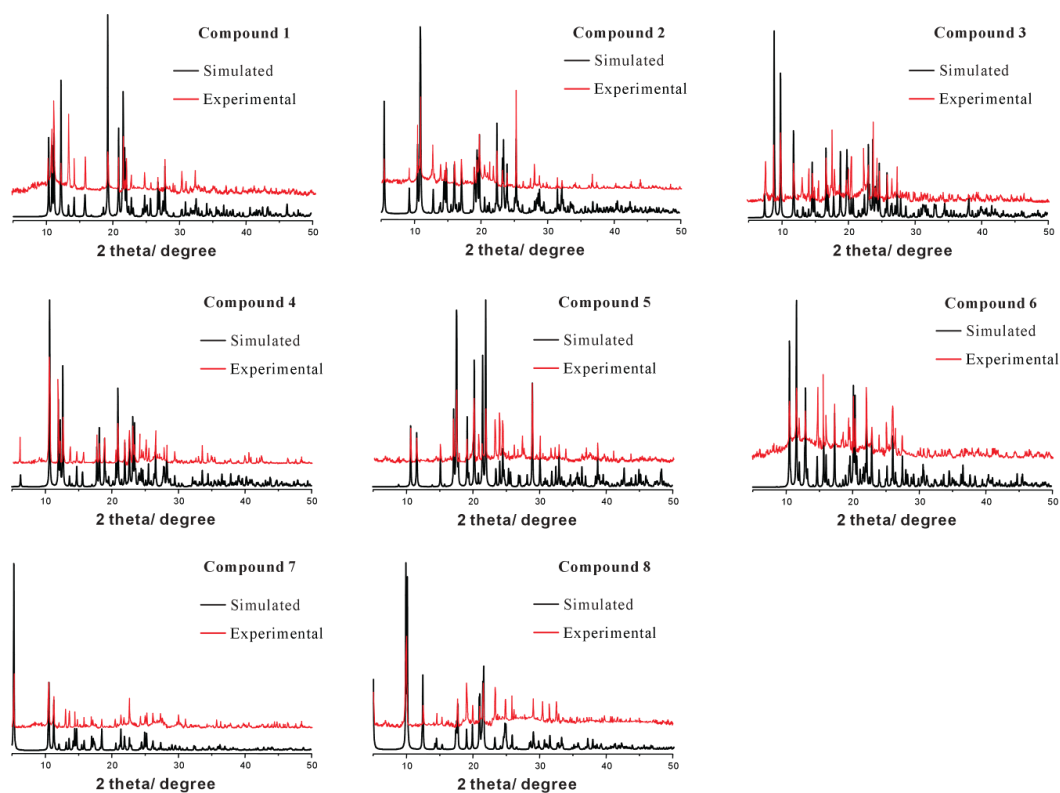

**(7) Figure S7: Solid-State Photoluminescences of CPs 1-8 at 77 K (black line) and 298 K (red line)**

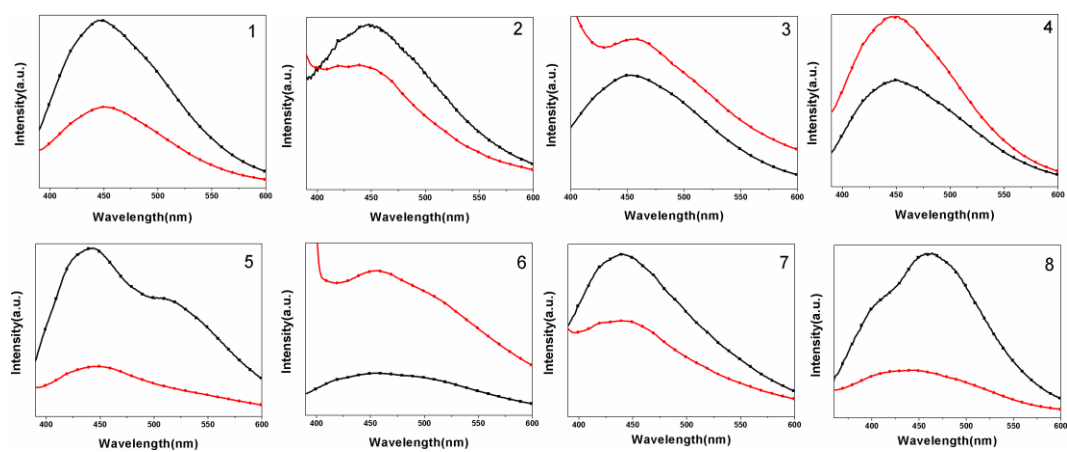

**Figure S7** Solid-State Photoluminescences of CPs 1-8 at 77 K (black line) and 298 K (red line).

**(8) Table S1: Selected bond lengths (Å) and angle (°) for 1-8.**

|                                             |            |                                       |            |                         |            |                         |            |
|---------------------------------------------|------------|---------------------------------------|------------|-------------------------|------------|-------------------------|------------|
| <b>Complex 1</b>                            |            |                                       |            |                         |            |                         |            |
| Zn1-N1                                      | 2.0012(17) | Zn1-O2A                               | 1.849(9)   |                         |            |                         |            |
| N1 <sup>i</sup> -Zn1-N1                     | 117.51(10) | O2A <sup>i</sup> -Zn1-N1 <sup>i</sup> | 106.3(3)   | O2A-Zn1-N1 <sup>i</sup> | 120.3(3)   |                         |            |
| Symmetry code: (i) $-x+1, y, -z+3/2$ .      |            |                                       |            |                         |            |                         |            |
| <b>Complex 2</b>                            |            |                                       |            |                         |            |                         |            |
| Zn1-N1                                      | 1.9925(19) | Zn1-O1                                | 1.9855(17) | Zn1-N3                  | 2.024(2)   | Zn1-O4 <sup>i</sup>     | 1.9577(18) |
| N1-Zn1-N3                                   | 110.49(8)  | O4 <sup>i</sup> -Zn1-N1               | 118.57(8)  | O1-Zn1-N1               | 106.96(8)  | O4 <sup>i</sup> -Zn1-N3 | 107.32(9)  |
| O1-Zn1-N3                                   | 98.37(8)   | O4 <sup>i</sup> -Zn1-O1               | 113.28(8)  |                         |            |                         |            |
| Symmetry code: (i) $x, y+1, z$ .            |            |                                       |            |                         |            |                         |            |
| <b>Complex 3</b>                            |            |                                       |            |                         |            |                         |            |
| Zn1-N1                                      | 2.010(2)   | Zn1-O1                                | 1.945(2)   | Zn1-N3 <sup>i</sup>     | 2.040(3)   | Zn1-O3                  | 1.982(2)   |
| N1-Zn1-N3 <sup>i</sup>                      | 102.79(10) | O1-Zn1-O3                             | 103.26(9)  | O1-Zn1-N1               | 128.50(10) | O3-Zn1-N1               | 110.39(10) |
| O1-Zn1-N3 <sup>i</sup>                      | 109.18(11) | O3-Zn1-N3 <sup>i</sup>                | 99.06(10)  |                         |            |                         |            |
| Symmetry code: (i) $-x+2, -y, -z+1$ .       |            |                                       |            |                         |            |                         |            |
| <b>Complex 4</b>                            |            |                                       |            |                         |            |                         |            |
| Zn1-N1                                      | 1.995(3)   | Zn1-O1                                | 1.990(2)   | Zn1-N3                  | 2.007(3)   | Zn1-O4 <sup>i</sup>     | 1.965(2)   |
| N1-Zn1-N3                                   | 120.27(12) | O4 <sup>i</sup> -Zn1-N1               | 112.27(11) | O1-Zn1-N1               | 105.66(11) | O4 <sup>i</sup> -Zn1-N3 | 104.14(11) |
| O1-Zn1-N3                                   | 115.15(11) | O4 <sup>i</sup> -Zn1-O1               | 96.99(10)  |                         |            |                         |            |
| Symmetry code: (i) $x-1, y-1, z$ .          |            |                                       |            |                         |            |                         |            |
| <b>Complex 5</b>                            |            |                                       |            |                         |            |                         |            |
| Zn1-N1                                      | 1.966(3)   | Zn1-O1W                               | 1.993(3)   | Zn1-O1                  | 1.920(2)   | Zn1-O4 <sup>i</sup>     | 1.922(3)   |
| N1-Zn1-O1W                                  | 101.34(13) | O1-Zn1-O4 <sup>i</sup>                | 95.74(11)  | O1-Zn1-N1               | 122.52(12) | O4 <sup>i</sup> -Zn1-N1 | 120.40(13) |
| O1-Zn1-O1W                                  | 108.81(12) | O4 <sup>i</sup> -Zn1-O1W              | 107.34(12) |                         |            |                         |            |
| Symmetry code: (i) $x+1/2, y-1/2, -z+1/2$ . |            |                                       |            |                         |            |                         |            |
| <b>Complex 6</b>                            |            |                                       |            |                         |            |                         |            |
| Zn1-N1                                      | 2.022(4)   | Zn1-O1                                | 1.954(4)   | Zn1-N3                  | 1.987(4)   | Zn1-O4 <sup>i</sup>     | 1.958(4)   |
| N3-Zn1-N1                                   | 103.26(17) | O1-Zn1-O4 <sup>i</sup>                | 109.02(17) | O1-Zn1-N1               | 113.61(17) | O4 <sup>i</sup> -Zn1-N1 | 96.34(18)  |
| O1-Zn1-N3                                   | 118.40(18) | O4 <sup>i</sup> -Zn1-N3               | 113.97(18) |                         |            |                         |            |
| Symmetry code: (i) $x+1/2, -y+1/2, z-1/2$ . |            |                                       |            |                         |            |                         |            |
| <b>Complex 7</b>                            |            |                                       |            |                         |            |                         |            |
| Zn1-N1                                      | 2.004(3)   | Zn1-O1                                | 1.962(2)   | Zn1-N3                  | 1.984(3)   | Zn1-O3 <sup>i</sup>     | 1.953(2)   |
| N3-Zn1-N1                                   | 107.22(12) | O3 <sup>i</sup> -Zn1-N1               | 113.04(11) | O1-Zn1-N1               | 100.62(11) | O3 <sup>i</sup> -Zn1-N3 | 115.72(12) |
| O1-Zn1-N3                                   | 108.82(12) | O3 <sup>i</sup> -Zn1-O1               | 110.30(11) |                         |            |                         |            |
| Symmetry code: (i) $x, y-1, z$ .            |            |                                       |            |                         |            |                         |            |
| <b>Complex 8</b>                            |            |                                       |            |                         |            |                         |            |
| Zn1-N1                                      | 2.043(5)   | Zn1-O1                                | 2.010(4)   | Zn1-N3                  | 2.043(5)   | Zn1-O3 <sup>i</sup>     | 2.033(16)  |
| N3-Zn1-N1                                   | 107.4(2)   | O1-Zn1-O3 <sup>i</sup>                | 108.8(5)   | O1-Zn1-N1               | 112.6(2)   | O3 <sup>i</sup> -Zn1-N1 | 116.9(5)   |
| O1-Zn1-N3                                   | 116.0(2)   | O3 <sup>i</sup> -Zn1-N3               | 94.1(5)    |                         |            |                         |            |
| Symmetry code: (i) $x, y-1, z$ .            |            |                                       |            |                         |            |                         |            |

---

**(9) Table S2: The Dimensions of the Windows and the Thickness of the 4<sup>4</sup>-sql Networks of 1, 2, 4, 7 and 8.**

---

|                                                              |            |            |             |
|--------------------------------------------------------------|------------|------------|-------------|
| <b>4<sup>4</sup>-sql net</b>                                 | <b>1</b>   | <b>2</b>   | <b>4</b>    |
| Dimension                                                    | 9.15×13.45 | 9.67×13.86 | 11.00×14.08 |
| $L_{\text{dimb}} \times L_{\text{dicarboxylate}} / \text{Å}$ |            | 9.67×14.06 | 11.00×13.30 |
| Thickness/Å                                                  | 3.94       | 9.98       | 6.74        |
| <b>4<sup>4</sup>-sql net</b>                                 | <b>7</b>   | <b>8</b>   |             |
| Dimension                                                    | 8.73×14.08 | 9.05×14.25 |             |
| $L_{\text{dimb}} \times L_{\text{dicarboxylate}} / \text{Å}$ | 8.73×14.50 | 9.05×12.98 |             |
| Thickness/Å                                                  | 10.73      | 10.02      |             |

---
